# Supplementary material
Source: HighWire-hosted journal article supplement (https://thorax.bmj.com/content/79/8/778)

## Human mesenchymal stromal cells inhibit *Mycobacterium avium* replication in clinically-relevant models of lung infection

Shaw TD, et al. *Thorax* 2024. DOI: 10.1136/thorax-2023-220819

Mesenchymal stromal cells (MSCs) caused PGE2-dependent reduction in *M. avium* colony-forming units (CFU) in human monocyte-derived macrophages (MDMs)

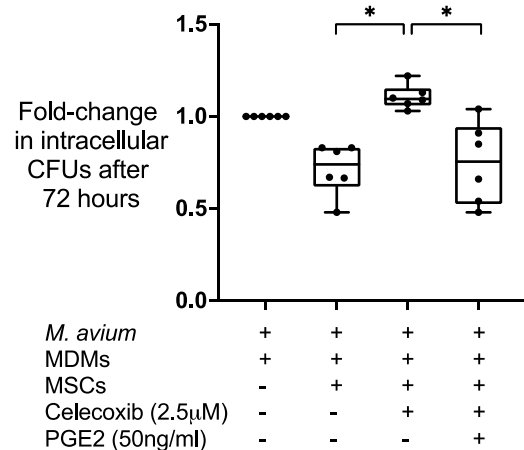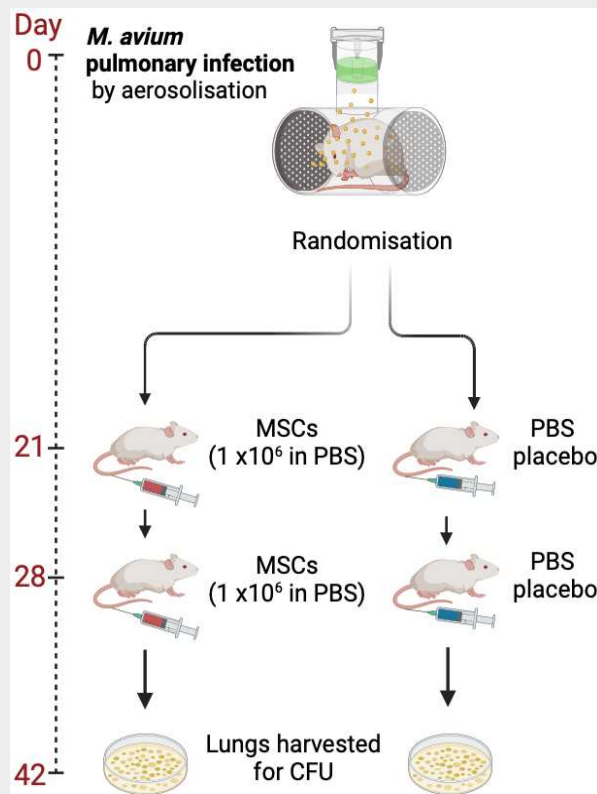

MSCs showed a similar antimicrobial effect in an *in vivo* model of *M. avium* complex pulmonary disease.

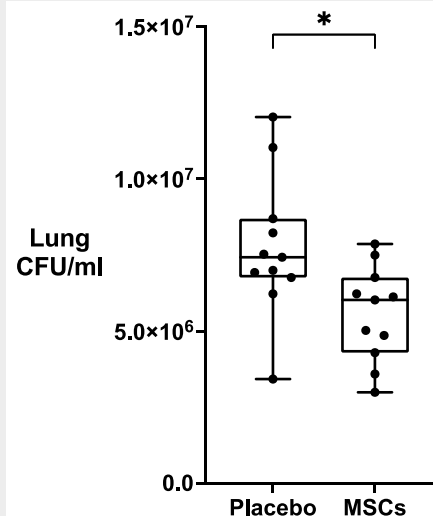

Supplement: inline-supplementary-material-2 [file inline-supplementary-material-2.pdf]
